# Supplementary material for: Gene transfer and protein dynamics in stem cells using single cell electroporation in a microfluidic device
Source: Royal Society of Chemistry journal article supplement (doi:10.1039/b713420g), 2007-11-26
Supplement: b713420g.pdf [file b713420g.pdf]

## SUPPLEMENTARY INFORMATION

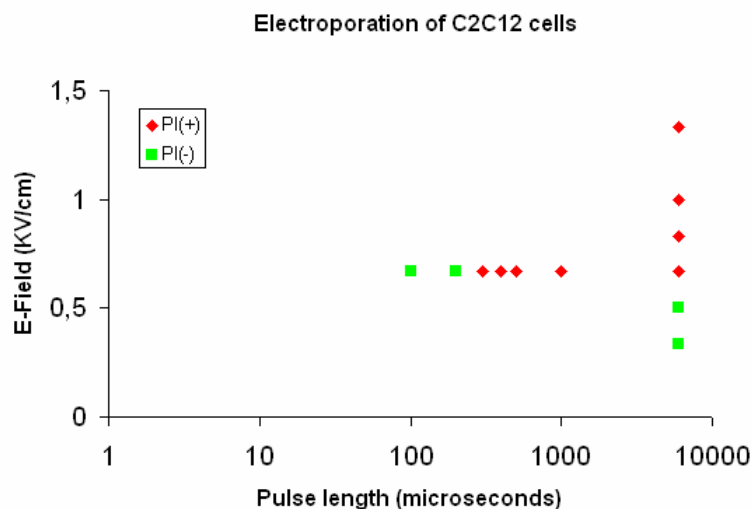

**Supplementary Figure S1. Relation between electric field strength and pulse length for PI uptake in electroporation of C2C12 cells.**

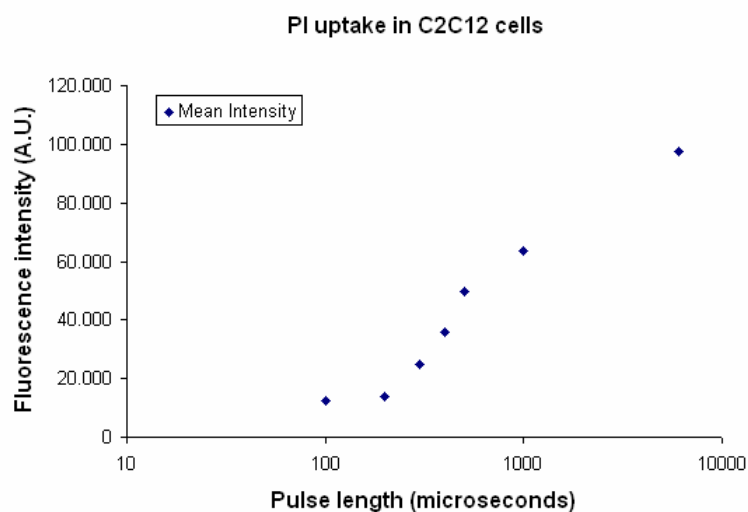

**Supplementary Figure S2. Effect of the pulse length on PI uptake in C2C12 cells:** for a fixed  $E$ -field of  $0.67 \text{ kV cm}^{-1}$ , an increase of the pulse length (from  $100 \text{ μs}$  to  $6 \text{ ms}$ ) results in increased fluorescence intensity of PI, thus more PI is taken up by the cell.
